# Supplementary material for: The ADP-Ribosylation Factor 4d Restricts Regulatory T-Cell Induction via Control of IL-2 Availability
Source: MDPI journal article supplement (doi:10.3390/cells11172639), 2022-08-25
Supplement: s1 [file s1]

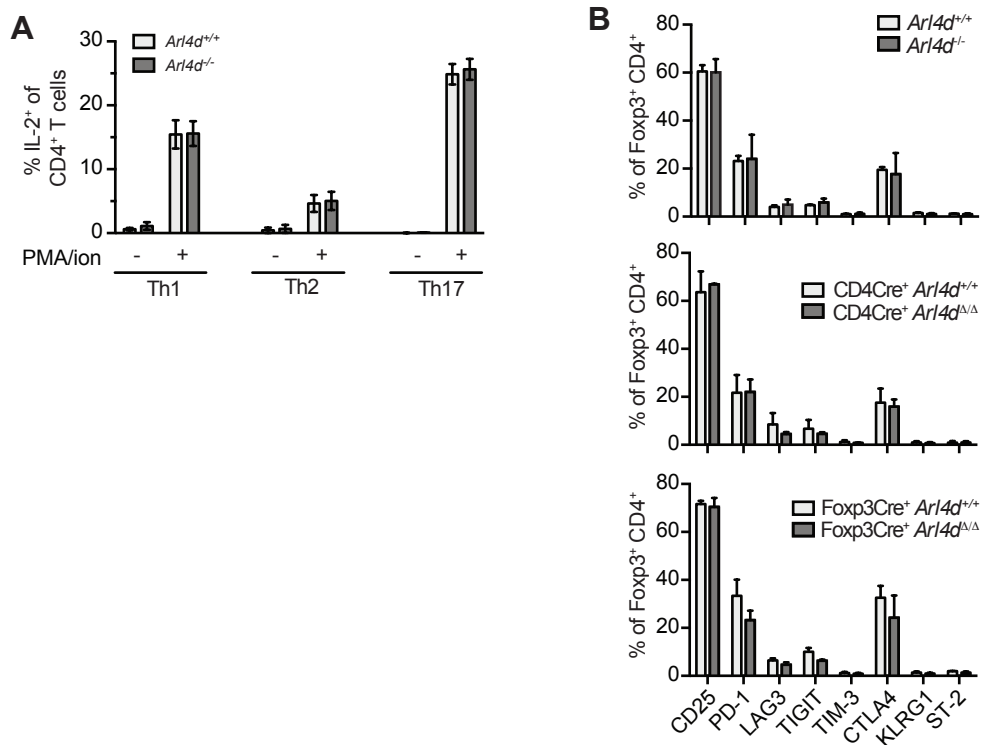

Figure S1: (A) *Arl4d*<sup>+/+</sup> or *Arl4d*<sup>-/-</sup> splenic CD4<sup>+</sup> T cells were differentiated into T<sub>H</sub>1, T<sub>H</sub>2, or T<sub>H</sub>17 cells using a commercial kit. After differentiation, CD4 T cells were stimulated with PMA and ionomycin and stained intracellularly for IL-2. (B) Expression of various surface markers associated with T<sub>reg</sub> suppressive activity in *in vitro*-induced Foxp3<sup>+</sup> CD4 T cells from *Arl4d*<sup>+/+</sup>, *Arl4d*<sup>-/-</sup>, CD4-Cre<sup>+</sup>*Arl4d*<sup>+/+</sup>, CD4-Cre<sup>+</sup>*Arl4d*<sup>Δ/Δ</sup>, Foxp3-Cre<sup>+</sup>*Arl4d*<sup>+/+</sup>, and Foxp3-Cre<sup>+</sup>*Arl4d*<sup>Δ/Δ</sup> animals.

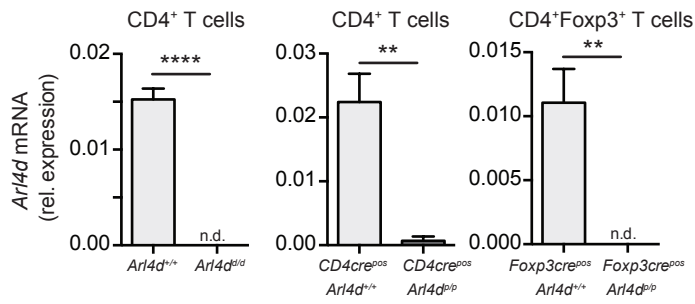

Figure S2: Successful knockdown of *Arl4d* mRNA in CD4-Cre x *Arl4d*<sup>fl/fl</sup> and Foxp3-Cre x *Arl4d*<sup>fl/fl</sup> mice. Splenic CD4<sup>+</sup> T cells and Foxp3<sup>+</sup> (YFP<sup>pos</sup>) CD4<sup>+</sup> T cells were isolated by magnetic beads and flow cytometric sorting, after which RNA was isolated for qPCR of *Arl4d* mRNA. As a control, splenic CD4<sup>+</sup> T cells from global *Arl4d*-deficient mice were used. Statistical significance was determined by Student's *t* test, \*\* *p* ≤ 0.01, \*\*\*\* *p* ≤ 0.0001, n.d.= not detectable.
